# Supplementary material
Source: PubMed Central journal article supplement (PMC3360153)
Supplement: supp_fj.11-198598_11-198598SuppFigS1.pdf [file supp_fj.11-198598_11-198598SuppFigS1.pdf]

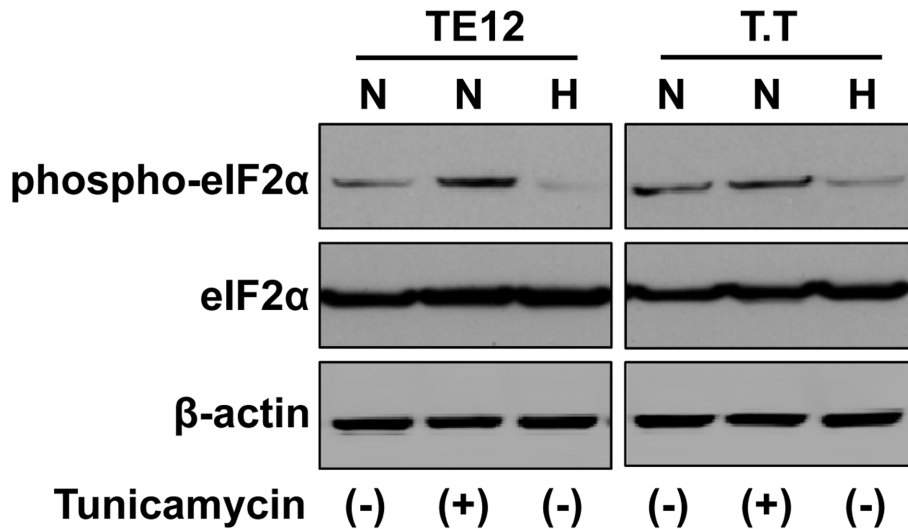

**Supplemental Figure 1. Hypoxia minimally induces eIF2 $\alpha$  phosphorylation in ESCC cells**

eIF2 $\alpha$  phosphorylation was determined in TE12 and T.T cells exposed to normoxia (N), hypoxia (H) or 2  $\mu$ g/ml Tunicamycin for 48 hrs. DMSO served as a vehicle. Tunicamycin induces phosphorylation of eIF2 $\alpha$  (1). Whole cell lysates were used for Western blotting with  $\beta$ -actin as a loading control. Cell viability was >95% in above experimental conditions.

**Supplementary Reference**

1. Harding, H. P., Zhang, Y., Bertolotti, A., Zeng, H., and Ron, D. (2000) Perk is essential for translational regulation and cell survival during the unfolded protein response. *Molecular cell* **5**, 897-904
